# Supplementary material for: Efficient lithium storage from modified vertically aligned carbon nanotubes with open-ends
Source: Royal Society of Chemistry journal article supplement (doi:10.1039/c5ra14263f), 2015-01-01
Supplement: c5ra14263f1.pdf [file c5ra14263f1.pdf]

## Supplementary information

### Efficient lithium storage from modified vertically aligned carbon nanotubes with open-ends

Hyun Young Jung,\* Sanghyun Hong, Ami Yu, Sung Mi Jung, Sun Kyoung Jeoung, and Yung Joon Jung\*

\*To whom correspondence should be addressed. E-mail: [hyjung@gntech.ac.kr](mailto:hyjung@gntech.ac.kr),

[jungy@coe.neu.edu](mailto:jungy@coe.neu.edu)

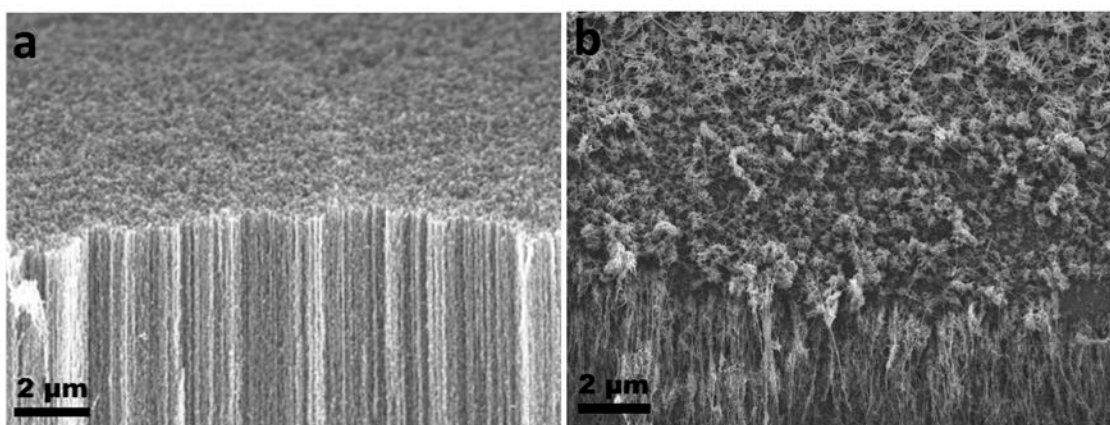

**Fig. S1.** SEM images of the working electrode before and after cycling measurements.
